# Supplementary material for: Comparative Efficacy of First-Line Immune-Based Combination Therapies in Metastatic Renal Cell Carcinoma: A Systematic Review and Network Meta-Analysis
Source: PubMed Central journal article supplement (PMC7352474; doi:10.3390/cancers12061673), 2020-06-24
Supplement: cancers-12-01673-s001.pdf [file cancers-12-01673-s001.pdf]

# Comparative Efficacy of First-Line Immune-Based Combination Therapies in Metastatic Renal Cell Carcinoma: A Systematic Review and Network Meta-Analysis

Reza Elaidi, Letuan Phan, Delphine Borchiellini, Philippe Barthelemy, Alain Ravaud, Stéphane Oudard and Yann Vano

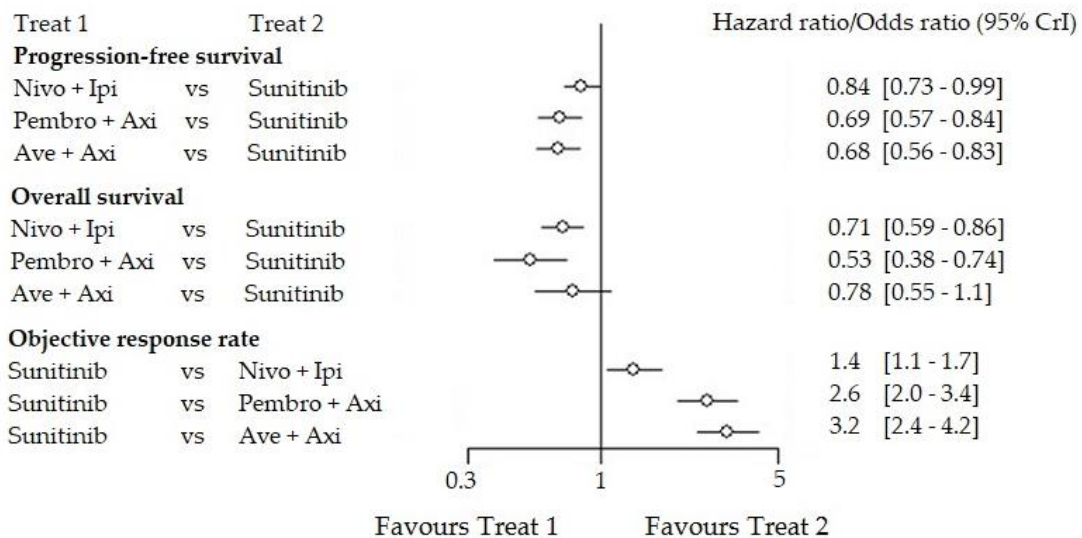

**Figure S1.** Forest plot for direct comparisons in the ITT population. HRs and ORs compare treatment 1 (Treat 1) to treatment 2 (Treat 2) (Online only).

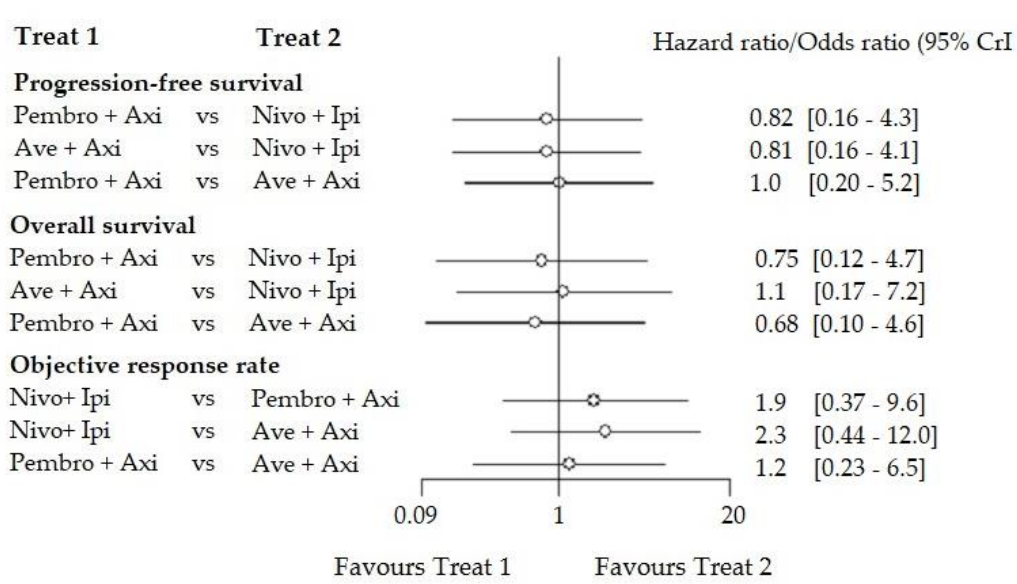

**Figure S2.** Forest plot of the indirect comparison between each combination for the 3 outcomes in the ITT population using a random effect model with informative priors (Online only). HRs and ORs compare treatment 1 (Treat 1) to treatment 2 (Treat 2). We used empirical priors for the between-study variance (heterogeneity) as proposed by R.Turner (2015). Other priors were also

tested as sensitivity analysis, but very few information being available for the combinations, more data would be needed to build more reliable informative priors.

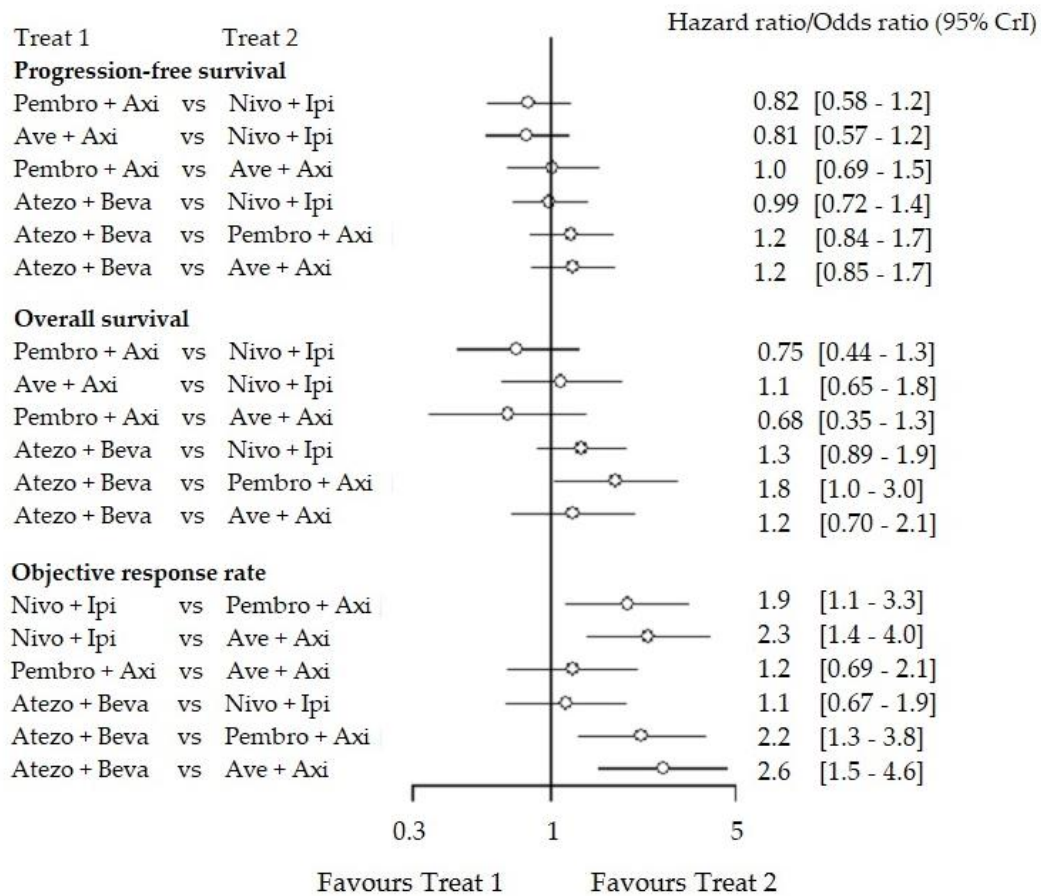

**Figure S3.** Forest plot of including Atezo + Beva as sensitivity analysis in the ITT population. HRs and ORs compare treatment 1 (Treat 1) to treatment 2 (Treat 2) (Online only).

**Table S1.** Bias assessment risk for the 3 selected studies of the network (Online only).

| Bias source                            | Checkmate 214 | Keynote 426 | Javelin Renal 101 |
|----------------------------------------|---------------|-------------|-------------------|
| Random Sequence Generation             | Low           | Low         | Low               |
| Allocation Concealment                 | Low           | Low         | Low               |
| Blinding of Participants and Personnel | High          | High        | High              |
| Blinding (Outcome Assessment)          | Unclear       | Low         | Low               |
| Incomplete Outcome Data                | Low           | Low         | Unclear           |
| Selective Reporting                    | Low           | Low         | Low               |
| Other Sources of Bias                  | Low           | Low         | Low               |

**Table S2.** Sources of all data extracted (Online only).

| Population     | Trial             | Outcome | Source                                  |
|----------------|-------------------|---------|-----------------------------------------|
| ITT            | Checkmate 214     | PFS     | Article–The Lancet                      |
|                |                   | OS      | Article–The Lancet                      |
|                |                   | ORR     | Article–The Lancet                      |
|                | Keynote 426       | PFS     | Article–New England Journal of Medicine |
|                |                   | OS      | Article–New England Journal of Medicine |
|                |                   | ORR     | Article–New England Journal of Medicine |
|                | Javelin renal 101 | PFS     | Presentation at ASCO GU                 |
|                |                   | OS      | Article–New England Journal of Medicine |
|                |                   | ORR     | Presentation at ASCO GU                 |
|                | IMmotion 151      | PFS     | Article–The Lancet                      |
|                |                   | OS      | Article–The Lancet                      |
|                |                   | ORR     | Article–The Lancet                      |
| IMDC Subgroups | Checkmate 214     | PFS     | Article–The Lancet                      |
|                |                   | ORR     | Article–The Lancet                      |
|                | Keynote 426       | PFS     | Presentation at ASCO                    |
|                |                   | ORR     | Presentation at ASCO                    |
|                | Javelin renal 101 | PFS     | Presentation at ASCO GU                 |
|                |                   | ORR     | Presentation at ASCO GU                 |
|                | CABOSUN           | PFS     | Article–European Journal of Cancer      |
|                |                   | ORR     | Article–European Journal of Cancer      |

**Table 3.** Ranking of PFS, OS and ORR in the ITT population, contrast-based approach (Online only).

| Progression-Free Survival |        |        |        |        |       |  |
|---------------------------|--------|--------|--------|--------|-------|--|
| Fixed Effect Model        | Rank 1 | Rank 2 | Rank 3 | Rank 4 | SUCRA |  |
| Nivo + Ipi                | 0.011  | 0.089  | 0.884  | 0.017  | 37%   |  |
| Pembro + Axi              | 0.466  | 0.480  | 0.053  | 0.000  | 80%   |  |
| Ave + Axi                 | 0.523  | 0.431  | 0.046  | 0.000  | 83%   |  |
| Sunitinib                 | 0.000  | 0.000  | 0.017  | 0.983  | 1%    |  |
| Random Effect Model       |        |        |        |        |       |  |
| Nivo + Ipi                | 0.132  | 0.2    | 0.468  | 0.171  | 42%   |  |
| Pembro + Axi              | 0.411  | 0.362  | 0.146  | 0.081  | 70%   |  |
| Ave + Axi                 | 0.447  | 0.340  | 0.140  | 0.073  | 72%   |  |
| Sunitinib                 | 0.010  | 0.069  | 0.247  | 0.675  | 14%   |  |
| Overall Survival          |        |        |        |        |       |  |
| Fixed Effect Model        | Rank 1 | Rank 2 | Rank 3 | Rank 4 | SUCRA |  |
| Nivo + Ipi                | 0.058  | 0.613  | 0.329  | 0.000  | 58%   |  |
| Pembro + Axi              | 0.892  | 0.085  | 0.023  | 0.000  | 96%   |  |
| Ave + Axi                 | 0.050  | 0.302  | 0.584  | 0.064  | 45%   |  |
| Sunitinib                 | 0.000  | 0.000  | 0.064  | 0.936  | 2%    |  |
| Random Effect Model       |        |        |        |        |       |  |
| Nivo + Ipi                | 0.122  | 0.527  | 0.306  | 0.045  | 58%   |  |
| Pembro + Axi              | 0.784  | 0.155  | 0.052  | 0.010  | 90%   |  |
| Ave + Axi                 | 0.094  | 0.299  | 0.459  | 0.148  | 45%   |  |
| Sunitinib                 | 0.000  | 0.019  | 0.183  | 0.797  | 7%    |  |
| Objective Response Rate   |        |        |        |        |       |  |
| Fixed Effect Model        | Rank 1 | Rank 2 | Rank 3 | Rank 4 | SUCRA |  |
| Nivo + Ipi                | 0.000  | 0.000  | 0.993  | 0.007  | 33%   |  |
| Pembro + Axi              | 0.174  | 0.826  | 0.000  | 0.000  | 73%   |  |
| Ave + Axi                 | 0.826  | 0.174  | 0.000  | 0.000  | 94%   |  |
| Sunitinib                 | 0.000  | 0.000  | 0.007  | 0.993  | 2%    |  |
| Random Effect Model       |        |        |        |        |       |  |
| Nivo + Ipi                | 0.028  | 0.073  | 0.767  | 0.132  | 58%   |  |
| Pembro + Axi              | 0.286  | 0.641  | 0.055  | 0.018  | 73%   |  |
| Ave + Axi                 | 0.684  | 0.272  | 0.033  | 0.010  | 88%   |  |
| Sunitinib                 | 0.002  | 0.013  | 0.145  | 0.840  | 6%    |  |

**Table 4.** Ranking of PFS and ORR in the IMDC good and intermediate/poor (pooled) risk groups, contrast-based approach (Online only).

| <b>Progression-Free Survival</b>                   |               |               |               |               |              |
|----------------------------------------------------|---------------|---------------|---------------|---------------|--------------|
| <b>IMDC Good Prognosis Population</b>              |               |               |               |               |              |
| <b>Fixed Effect Model</b>                          | <b>Rank 1</b> | <b>Rank 2</b> | <b>Rank 3</b> | <b>Rank 4</b> | <b>SUCRA</b> |
| Nivo + Ipi                                         | 0.001         | 0.025         | 0.096         | 0.878         | 5%           |
| Pembro + Axi                                       | 0.125         | 0.703         | 0.124         | 0.048         | 63%          |
| Ave + Axi                                          | 0.873         | 0.117         | 0.008         | 0.003         | 95%          |
| Sunitinib                                          | 0.002         | 0.155         | 0.772         | 0.071         | 36%          |
| <b>Random Effect Model</b>                         | <b>Rank 1</b> | <b>Rank 2</b> | <b>Rank 3</b> | <b>Rank 4</b> | <b>SUCRA</b> |
| Nivo + Ipi                                         | 0.039         | 0.100         | 0.176         | 0.685         | 16%          |
| Pembro + Axi                                       | 0.193         | 0.520         | 0.166         | 0.121         | 60%          |
| Ave + Axi                                          | 0.752         | 0.174         | 0.042         | 0.032         | 88%          |
| Sunitinib                                          | 0.016         | 0.206         | 0.616         | 0.162         | 36%          |
| Nivo + Ipi                                         | 0.001         | 0.025         | 0.096         | 0.878         | 5%           |
| <b>IMDC Intermediate/Poor Prognosis Population</b> |               |               |               |               |              |
| <b>Fixed Effect Model</b>                          | <b>Rank 1</b> | <b>Rank 2</b> | <b>Rank 3</b> | <b>Rank 4</b> | <b>SUCRA</b> |
| Nivo + Ipi                                         | 0.087         | 0.310         | 0.602         | 0.001         | 49%          |
| Pembro + Axi                                       | 0.553         | 0.329         | 0.118         | 0.000         | 81%          |
| Ave + Axi                                          | 0.360         | 0.361         | 0.270         | 0.009         | 69%          |
| Sunitinib                                          | 0.000         | 0.000         | 0.010         | 0.990         | 3%           |
| <b>Random Effect Model</b>                         | <b>Rank 1</b> | <b>Rank 2</b> | <b>Rank 3</b> | <b>Rank 4</b> | <b>SUCRA</b> |
| Nivo + Ipi                                         | 0.188         | 0.311         | 0.379         | 0.121         | 52%          |
| Pembro + Axi                                       | 0.459         | 0.304         | 0.167         | 0.069         | 72%          |
| Ave + Axi                                          | 0.344         | 0.325         | 0.234         | 0.097         | 64%          |
| Sunitinib                                          | 0.009         | 0.059         | 0.220         | 0.712         | 12%          |
| <b>Objective Response Rate</b>                     |               |               |               |               |              |
| <b>IMDC Good Prognosis Population</b>              |               |               |               |               |              |
| <b>Fixed Effect Model</b>                          | <b>Rank 1</b> | <b>Rank 2</b> | <b>Rank 3</b> | <b>Rank 4</b> | <b>SUCRA</b> |
| Nivo + Ipi                                         | 0.000         | 0.001         | 0.040         | 0.96          | 1%           |
| Pembro + Axi                                       | 0.076         | 0.923         | 0.002         | 0.00          | 69%          |
| Ave + Axi                                          | 0.924         | 0.076         | 0.000         | 0.00          | 97%          |
| Sunitinib                                          | 0.000         | 0.001         | 0.959         | 0.04          | 32%          |
| <b>Random Effect Model</b>                         | <b>Rank 1</b> | <b>Rank 2</b> | <b>Rank 3</b> | <b>Rank 4</b> | <b>SUCRA</b> |
| Nivo + Ipi                                         | 0.062         | 0.116         | 0.170         | 0.653         | 20%          |
| Pembro + Axi                                       | 0.272         | 0.475         | 0.135         | 0.119         | 63%          |
| Ave + Axi                                          | 0.645         | 0.226         | 0.080         | 0.049         | 82%          |
| Sunitinib                                          | 0.021         | 0.184         | 0.616         | 0.179         | 35%          |
| <b>IMDC Intermediate/Poor Prognosis Population</b> |               |               |               |               |              |
| <b>Fixed Effect Model</b>                          | <b>Rank 1</b> | <b>Rank 2</b> | <b>Rank 3</b> | <b>Rank 4</b> | <b>SUCRA</b> |
| Nivo + Ipi                                         | 0.005         | 0.295         | 0.700         | 0             | 44%          |
| Pembro + Axi                                       | 0.040         | 0.661         | 0.299         | 0             | 58%          |
| Ave + Axi                                          | 0.955         | 0.044         | 0.001         | 0             | 98%          |
| Sunitinib                                          | 0.000         | 0.000         | 0.000         | 1             | 0%           |
| <b>Random Effect Model</b>                         | <b>Rank 1</b> | <b>Rank 2</b> | <b>Rank 3</b> | <b>Rank 4</b> | <b>SUCRA</b> |
| Nivo + Ipi                                         | 0.198         | 0.293         | 0.322         | 0.187         | 50%          |
| Pembro + Axi                                       | 0.249         | 0.341         | 0.246         | 0.164         | 56%          |
| Ave + Axi                                          | 0.541         | 0.257         | 0.120         | 0.082         | 75%          |
| Sunitinib                                          | 0.012         | 0.110         | 0.311         | 0.567         | 19%          |

**Table S5.** Parameter estimation of the arm-based Weibull model for PFS and OS (Online only).

| Study                                  | Parameter | Estimation | SD      | 95% CrI<br>CrI upper |
|----------------------------------------|-----------|------------|---------|----------------------|
| <b>Progression-Free Survival</b>       |           |            |         |                      |
| <b>Checkmate 214<br/>Nivo + Ipi</b>    | Delta1    | 0.2343     | 0.1018  | (-0.422; -0.0177)    |
|                                        | Delta2    | -0.094     | 0.1074  | (-0.314; 0.110)      |
|                                        | Mu1       | -2.248     | 0.0825  | (-2.415; -2.091)     |
|                                        | Mu2       | -0.4521    | 0.0902  | (-0.6281; -0.275)    |
| <b>Keynote 426<br/>Pembro + Axi</b>    | Delta1    | -0.2866    | 0.0996  | (-0.494; -0.101)     |
|                                        | Delta2    | -0.0563    | 0.1166  | (-0.270; 0.189)      |
|                                        | Mu1       | -2.752     | 0.0878  | (-2.925; -2.581)     |
|                                        | Mu2       | -0.0140    | 0.1265  | (-0.264; 0.232)      |
| <b>Javelin Renal 101<br/>Ave + Axi</b> | Delta1    | -0.2888    | 0.101   | (-0.498; -0.0996)    |
|                                        | Delta2    | -0.071     | 0.1049  | (-0.272; 0.140)      |
|                                        | Mu1       | -2.336     | 0.0916  | (-2.517; -2.158)     |
|                                        | Mu2       | -0.241     | 0.09381 | (-0.426; -0.058)     |
| <b>Overall Survival</b>                |           |            |         |                      |
| <b>Checkmate 214<br/>Nivo + Ipi</b>    | Delta1    | -0.424     | 0.159   | (-0.730; -0.108)     |
|                                        | Delta2    | 0.076      | 0.107   | (-0.137; 0.282)      |
|                                        | Mu1       | -4.001     | 0.129   | (-4.257; -3.752)     |
|                                        | Mu2       | 0.056      | 0.083   | (-0.108; 0.220)      |
| <b>Keynote 426<br/>Pembro + Axi</b>    | Delta1    | 0.076      | 0.107   | (-0.137; 0.282)      |
|                                        | Delta2    | -0.462     | 0.162   | (-0.787; -0.150)     |
|                                        | Mu1       | -4.112     | 0.153   | (-4.421; -3.821)     |
|                                        | Mu2       | 0.068      | 0.177   | (-0.277; 0.411)      |
| <b>Javelin Renal 101<br/>Ave + Axi</b> | Delta1    | 0.077      | 0.130   | (-0.175; 0.334)      |
|                                        | Delta2    | -0.429     | 0.164   | (-0.748; -0.106)     |
|                                        | Mu1       | -4.170     | 0.182   | (-4.537; -3.824)     |
|                                        | Mu2       | 0.183      | 0.133   | (-0.078; 0.443)      |

Note: Delta 1 and Delta 2 refer to the experimental arm Weibull parameters, as described by Ouwen and Jansen. Mu 1 and Mu 2 refer to the control arm Weibull parameters, as described by Ouwen and Jansen.

### File S1: Detailed search strategy for systematic review (Online only)

**Research question:** Comparing the efficacy of the new treatment combinations for patients with metastatic renal cell carcinoma in the first-line setting, in term of progression-free survival, overall survival and objective response rate.

#### Eligibility criteria

##### *Inclusion criteria:*

- Randomized controlled trial
- Include patients with metastatic renal cell carcinoma
- Experimental treatment involves immune checkpoint inhibitor combination

##### *Exclusion criteria:*

- Not reporting the co-primary outcomes
- Include only subpopulation (i.e. age or region restraint, IMDC subgroups etc.)
- Include patients previously treated for renal cell carcinoma (not in first-line setting)

#### Searched databases:

Pubmed, Cochrane library, Clinicaltrial.gov, relevant congresses (ESMO, ASCO, etc.)

**Keyword:**

"renal cell carcinoma" AND (randomized controlled trial)

**Details in PubMed:**

"renal cell carcinoma"[All Fields] AND ("randomized controlled trial"[Publication Type] OR "randomized controlled trials as topic"[MeSH Terms] OR "randomized controlled trial"[All Fields] OR "randomised controlled trial"[All Fields]) AND ("2015/01/01"[PDAT] : "2019/10/31"[PDAT])

**Cochrane Library:**

(randomized clinical trial "renal cell carcinoma" metastatic or advanced "Immune checkpoint inhibitor"):ti,ab,kw with Publication Year from 2015 to 2019, with Cochrane Library publication date Between Jan 2015 and Oct 2019, in Trials (Word variations have been searched)

(See flowchart for election process)

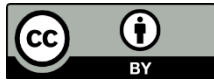

© 2020 by the authors. Licensee MDPI, Basel, Switzerland. This article is an open access article distributed under the terms and conditions of the Creative Commons Attribution (CC BY) license (<http://creativecommons.org/licenses/by/4.0/>).
